# Post-intervention Epidemiology of STH in Bangladesh: data to sustain the gains

**Short title: Evaluation of the impact of 12 years of PCT: STH epidemiology in Bangladesh**

Sanjaya Dhakal<sup>1¶</sup>, Mohammad Jahirul Karim<sup>2¶</sup>, Abdullah Al Kawsar<sup>2&</sup>, Jasmine Irish<sup>1&</sup>, Mujibur Rahman<sup>2</sup>, Cara Tupps<sup>1</sup>, Ashraful Kabir<sup>1&</sup>, Rubina Imtiaz<sup>1\*¶</sup>

1 Children Without Worms, The Task Force for Global Health, Atlanta, GA, USA

2 Communicable Disease Control, Ministry of Health & Family Welfare, Dhaka, Bangladesh

Corresponding author

E-mail: [rimitiaz@taskforce.org](mailto:rimitiaz@taskforce.org)

¶ SD, MJK and RI contributed equally to this work.

& JI, AAK and AK contributed equally to this work.

## **Abstract**

### **Introduction**

In 2008, Bangladesh initiated Preventive Chemotherapy (PCT) for school-age children (SAC) through bi-annual school-based mass drug administration (MDA) to control Soil-Transmitted Helminth (STH) infections. In 2016, the Ministry of Health and Family Welfare's Program on Lymphatic Filariasis Elimination and STH (ELFSTH) initiated district-level community impact assessments with Children Without Worms (CWW) using standardized, population-based sampling to measure the post-intervention STH burden across all ages ( $\geq 1$  yr) for the three STH species.

### **Methods & Principal Findings**

The Integrated Community-based Survey for Program Monitoring (ICSPM) was developed by CWW and was used to survey 12 districts in Bangladesh from 2017 – 2020. We combined the individual demographic and parasite-specific characteristics from 10 districts and linked them with the laboratory data for collective analysis. Our analysis identified district-specific epidemiologic findings, important for program decisions.

Of the 17,874 enrolled individuals, 10,824 (61%) provided stool samples. Overall, the prevalence of any STH species was substantially reduced to 14% from 79.8% in 2005. The impact was similar across all ages. STH prevalence was below 10% in 10 districts collectively, but remained high in 4 districts, despite their high reported PCT coverage in previous years.

Among all, Bhola district was unique because it was the only district with high Trichuris prevalence.

### **Conclusion**

Bangladesh successfully lowered STH prevalence across all ages despite targeting SAC only. Data from the survey indicate significant number of adults and pre-school age children (PSAC) were self-deworming with purchased pills. This may account for the flat impact curve across all ages. Overall prevalence varied across surveyed districts, with persistent high transmission in the northeastern districts and a district in the central flood zone, indicating possible service and ecological factors. Discrepancies in the impact between districts highlight the need for district-level data to evaluate program implementation after consistent high PCT coverage.

## **Authors Summary:**

Bangladesh government conducted school-based mass drug administration (MDA) for over 10 years to control soil-transmitted helminth (STH) infections. School-based evaluations of MDA indicate a reduction in STH burden among school-aged children (SAC). To further assess the impact on the community, Children Without Worms and the Ministry of Health and Family Welfare's Program on Lymphatic Filariasis Elimination and STH (ELFSTH) initiated district-level community impact surveys in 12 districts. We share the results from the latter 10 districts here.

Our analysis of 10,824 interviews and stool samples from 10 districts showed an estimated 14% of community members infected with at least one species of STH. This finding is substantially lower than the baseline STH prevalence (79.8%) estimated in 2005. Bangladesh's successful impact was achieved across all ages despite only treating SAC. Deworming source data showed significant numbers of adults and pre-school age children (PSAC) self-dewormed with locally purchased pills. Prevalence varied across the surveyed districts, with persistent high transmission in the northeastern districts and a district in the central flood zone, indicating possible ecological and service factors contributing to persistent infections. Discrepancies in the impact across districts highlights the need for sub-national level data to evaluate program performance following consistent high intervention.

## 1 Introduction

2 In 2001, the World Health Organization (WHO) recommended that member states  
3 control Soil-Transmitted Helminthiasis (STH) morbidity through preventive chemotherapy (PCT)  
4 in endemic regions. The recommended guidance utilizes a school-based platform to target one  
5 high-risk group, school-age children (SAC) through mass drug administration (MDA) to achieve  
6 at least 75% coverage consistently for five years. Once this is achieved, an impact assessment  
7 survey is recommended (1). Like many developing countries, Bangladesh bears a high burden of  
8 STH. An estimated STH prevalence of 79.8% (44% of which was moderate-to-high intensity,  
9 MHI, of *Ascaris*) among school-aged Bangladeshi children was reported in 2005 (2). By January  
10 2020, Bangladesh had completed 23 rounds of school-based bi-annual MDA with Mebendazole.  
11 Bangladesh receives the largest Mebendazole donation of all endemic countries (approximately  
12 20% of the global donation) and has an excellent supply chain record over the past 5 years (SCF-  
13 NTD data: CWW pulled June 2020).

14 Annual coverage data from Bangladesh indicates consistent coverage of greater than  
15 75% for more than five years before ICSPM surveys began in 2017 (3). Previously, PCT coverage  
16 data was used as a proxy to indirectly evaluate the impact of deworming on the STH burden (3,  
17 4). A major limitation of this approach was the inability to assess the true burden of disease in  
18 the community at risk because; 1.) MDA targets only SAC (a small proportion of the at-risk  
19 population, 2.) the quality of coverage data is not tested, and 3.) targeted parasites have  
20 variable sensitivity to the single drug used for MDAs (5, 6). Additionally, PCT coverage data does  
21 not include children outside schools and adults. Available evidence indicates that these  
22 additional risk populations such as pre-school-age children (PSAC) and adults, particularly

23 women of reproductive age (WRA) are also at risk of STH infection and share a substantial  
24 disease burden (7-9).

25 Therefore, to better understand the community-level program impact, the ELFSTH  
26 Program, the Bangladesh Ministry of Health & Family Welfare (MOHFW) collaborated with  
27 Children Without Worms (CWW) to conduct community-level impact assessment surveys called  
28 Integrated Community-based Survey for Program Monitoring (ICSPM) from 2017 to 2020. The  
29 main objectives of the surveys were:

- 30 i. To estimate the statistically valid prevalence of STH infection and prevalence of  
31 moderate to high-intensity infection (MHII) in PSAC, SAC and adults (greater  
32 than 14 years old), powered to the district level, and
- 33 ii. To evaluate potential correlates of STH infection rates including sanitation &  
34 hygiene behaviors (household level) and history and source of deworming  
35 (individual level).

36 In this paper, we present the results of concatenated survey data from 10 districts  
37 conducted between 2017 and 2020, focusing on parasite- and age-specific prevalence and  
38 infection intensity as well as the geographic variation of STH prevalence. This paper also  
39 presents how these results are applicable for use by the ELFSTH program towards future  
40 program actions, and how this approach can assist other similarly advanced NTD programs  
41 around the world.

42

## 43 **Methods:**

### 44 **Study design**

45 ICSPM surveys were conducted in 12 districts, representing 7 out of 8 divisions across  
46 Bangladesh, to evaluate the impact of MDA at the community level for each parasite and each  
47 risk group; to validate deworming pill intake and pill source within six months before the  
48 survey, and to assess the effect of select WASH variables at the household level. Based on age,  
49 we defined three risk groups as follows:

- 50 • 1 – 4 pre-school age children (PSAC)
- 51 • 5 – 14 school-age children (SAC)
- 52 • greater than 14 years old (adults)

53 The districts were selected by the Bangladesh ELFSTH as a good evaluation unit (EU) as  
54 the district is the most common administrative unit for implementation decisions where these  
55 results could be utilized. Figure 1 shows the years of each survey for the 10 districts.

56 The ICSPM survey is a community-based, cross-sectional survey based on probability  
57 proportional to size sampling (PPSS). The details of the ICSPM survey methodology is available  
58 on the CWW website (<http://www.childrenwithoutworms.org/>). Briefly, the survey design entails a  
59 cross-sectional, mixed cluster & random systematic sample methodology and has been  
60 previously detailed (10). The ICSPM methodology primarily relies on WHO's "Assessing the  
61 epidemiology of STH during a transmission assessment survey (11). We targeted a sample size  
62 of 332 for each risk group, which gave us one-sided 95% confidence for determining if the <10%  
63 prevalence, action threshold was achieved. Since the average non-response rate in the first

64 two pilot districts was around 40%, we enrolled 465 individuals in each risk group in subsequent  
65 districts to account for this. The sampling interval was based on the proportion of each risk  
66 group within the population. The survey team used the Survey Sample Builder (SSB) tool, which  
67 was adapted to the ICSPM methodology, an excel program developed by Neglected Tropical  
68 Diseases Support Center, The Task Force for Global Health (TFGH) to select clusters and risk  
69 groups within the households.

70 We used the Kato-Katz method to identify and count the eggs of STH parasites following  
71 standard WHO methodology using 2-slides per stool specimen. Ten percent of slides were  
72 tested blindly by another laboratory scientist for quality control. Three data sets (Household,  
73 Individual, and Laboratory) were downloaded from the secure cloud-based data-hosting  
74 platform and saved in local computers at CWW, Atlanta. After basic data cleaning, household  
75 data were first merged with individual data and later with laboratory data making one linked  
76 data file for each district. We recoded and reformatted variables as necessary to align across  
77 the districts before combining the individual data files from surveyed districts. Finally, we  
78 prepared one analytical data file for this report by stacking 10 individual data files from each of  
79 the surveyed districts. According to the 2011 national population census, this analysis  
80 represents about 15.5% of the Bangladesh population.

81 We used SAS version 9.4 (SAS Inc., Cary NC, USA) to manage and analyze the data. We  
82 accounted for the cluster sample survey design in all analyses using appropriate SAS  
83 procedures. Chi-square ( $\chi^2$ ) test was used to assess differences in prevalence between risk  
84 groups and p-values  $\leq 0.05$  were considered significant. Since the survey was powered to detect  
85 the prevalence of STH and MHII down to a threshold of <10% at the district level, only upper



86 sided, 95% confidence limits are reported. We also ran some explorative analyses at the sub-  
87 district level, which lacked statistical power but provide useful insights for further program  
88 actions.

89 Participation in the survey was voluntary and participants provided verbal consent  
90 before the main survey. Bangladesh Medical Research Council approved the survey protocol.

91

92 **Results:**

93 **Basic characteristics**

94 Of 17,874 enrollees, 11,022 (62.0%) provided stool samples for laboratory examination.

95 In total, 198 (1.6%) records were excluded during the data cleaning process due to;

96 a.) IDs present in only one dataset

97 b.) duplicate IDs with mismatching data across other variables, and

98 c.) data entry errors.

99 The final dataset had 10,824 records which were used for the analysis presented here (figure 2).

100 **Prevalence and Intensity of STH Infections:**

101 The overall prevalence of any STH infection in 10 districts was 14.0% (figure 3). There  
102 was no statistical difference in the prevalence of STH infection across the risk groups. We did  
103 not observe statistically different prevalence between females (14.4%) and males (13.4%). Of  
104 the three tested parasites, *Ascaris* was the most common (10.5%) followed by *trichuris* (4.4%).  
105 The prevalence of hookworm was less than 1% in all risk groups, so the results for hookworm  
106 prevalence are not shown. Three districts with the highest STH prevalence were Sunamganj  
107 (40.4%), Bhola (36.5%), and Sirajganj (26.9%). In contrast, Satkhira (2.0%), Jhenaidah (2.4%),  
108 and Manikganj (3.1%) had the lowest STH prevalence (figure 3).

109 Overall, the intensity of STH MHII for 10 districts was 3.3%. Bhola (10.6%), Sunamganj  
110 (10.4%), Sirajganj (7.1%), and Moulvibazar (3.6%) were four districts with MHII above the WHO-  
111 recommended threshold of <1%, while the remaining 6 districts had achieved this goal with

112 MHII ranging from 0.0% to 0.2% (table 1). This is a significant achievement for the national  
113 program and signifies the achievement of the WHO goal of eliminating STH morbidity in  
114 majority districts.

115 We further explored three high prevalence (>20%) districts- Sunamganj, Bhola, and  
116 Sirajganj- to understand if there were any geographic concentrations of STH infection at the  
117 sub-district level. Figure 4 illustrates the STH prevalence by sub-districts in these three high-  
118 prevalence districts. The prevalence of STH was higher than 50% in two sub-districts (Dowara  
119 Bazar and Dakshin Sunamganj) of Sunamganj and one sub-district (Belkuchi) of Sirajganj district.

120

### 121 **History of deworming**

122 The proportion of self-reported deworming was highest among SAC (75.6%) followed by  
123 adults (69.1%) and PSAC (51.9%) for the 9,386 (86.7%) individuals who provided the history of  
124 deworming in the previous 6 months (table 2).

125 Among responders (n= 7,469) to the query of the location of deworming, 88.6% of SAC  
126 reported getting dewormed through school-based MDA, while 85.1% adults and 76.2% of PSAC  
127 were dewormed through locally purchased deworming medicines (figure 5).

128

129 **Discussion:**

130 To our knowledge, this is the first time an impact evaluation of MDA directed at one  
131 specific risk group, SAC, has shown a significant reduction in STH prevalence across all age  
132 groups in a given community. Our analysis of pooled data from community-based surveys in 10  
133 districts in Bangladesh found a substantial reduction in overall STH prevalence from 79.8%  
134 (2005) to 14.0% (2017-2020) across all risk groups after more than 10 years of school-based  
135 systematic biannual PCT for SAC. Despite SAC being the only targeted risk group for MDA, the  
136 data shows no statistically significant differences in STH prevalence among PSAC, SAC, and  
137 adults. Although we did not specifically explore potential impact variables on the community  
138 prevalence, we speculate that the following factors might have contributed to this observation:

- 139 1. Change in health-seeking behavior in adults, namely purchasing deworming  
140 medication for themselves and family members outside of school (correlates with data on  
141 the source of deworming for PSAC and adults). This could be attributed to the positive  
142 results of school-based MDA encouraging out-of-school villagers to seek deworming, and
- 143 2. Improved WASH factors have increased access to improved sanitation at the  
144 household level.

145 In a recent national school survey of 5 to 12-year-old schoolchildren from 106 schools  
146 across the country (data not published yet), Bangladesh ELFSTH reported a lower STH  
147 prevalence than the prevalence derived from ICSPM surveys for the same age range (8.1% vs.  
148 13%). Similarly, the MHII among this age group was 1.7% in the school-based survey and 2.6%  
149 with the ICSPM. The school-based survey had some limitations, including:

- 150 a. A small proportion of only school-going children were sampled as the targeted  
151 population rather than the entire endemic community.
- 152 b. The survey was not statistically powered to the program implementation level, nor the  
153 national school-attending population.

154 The observed difference in STH prevalence by school versus community-based surveys  
155 indicates that the school-based surveys may not be the right tool to estimate the true  
156 prevalence and intensity of STH for sub-national level program planning. This is especially true  
157 for advanced programs where prevalence is generally reduced and remaining aggregated areas  
158 of continuing transmission need to be reliably identified to redistribute precious resources for  
159 most efficient actions.

160 According to the latest WHO guidance(12), the 2030 goal for STH morbidity elimination is  
161 achieved when a country/region reaches <2% MHII. The school survey indicates that  
162 Bangladesh has achieved this goal and can halt MDA for 2 years per WHO guidance (13).  
163 However, the population-based ICSPM data for the same risk groups in the same geographic  
164 areas shows the true prevalence of intensity to be still > 2. The more granular ICSPM data  
165 provides more meaningful guidance to the program, i.e. reducing MDAs in low prevalence areas  
166 but increasing interventions in clusters of high transmission that persist. Our findings are similar  
167 to those from a school based survey in Sri Lanka (14).

168 Therefore, for countries with mature programs who have reach the WHO goal of  
169 consistent coverage above 75% for 5 years, we recommend a statistically valid, population-

170 based sampling approach to assess the sub-national level impact on prevalence and intensity of  
171 STH for use in data-driven program decision-making or policy adjustments.

172 Additionally, our analysis revealed that the impact of STH control measures is not uniform  
173 across the country: it was significantly reduced in six districts, while the other four still carry a  
174 burden of higher prevalence and intensity. Potential factors influencing the impact of MDA on  
175 STH prevalence and intensity may be related to the local population and individual  
176 characteristics, as well as service processes related to intervention quality such as:

- 177 1. Varied baseline STH prevalence and intensity. (data not available)
- 178 2. Population movement across district borders, bringing the infection from other areas.
- 179 3. The complicated relationship between drug distributors and targeted risk groups.
- 180 4. Variable environmental or ecological characteristics among districts that support longer  
181 survival of STH eggs in the soil.
- 182 5. False rumors or distrust of government programs about the 'real' purpose of the  
183 treatment, and
- 184 6. Responses to local socio-cultural control measures.

185 Among high STH prevalent districts, STH prevalence ranged from 5.1% (Kazipur sub-  
186 district, Sirajganj) to 71% (Dowara Bazar sub-district, Sunamganj). All corresponding sub-  
187 districts (Sunamganj and Bhola), seven of nine sub-districts (Sirajganj), and one of seven sub-  
188 districts (Moulvibazar) had a prevalence of more than 20%.

189 The Bangladesh national NTD program's STH control office plans to use these findings to  
190 design a focused intervention program in select sub-districts to lower unexpected high

191 prevalence. Additionally, the national program may use these findings to make decisions for  
192 altering the frequency of MDA programs in low prevalence districts.

193 To further explore the consistent impact across all age groups, we reviewed the pill intake  
194 and their source data by age group and by district as well as collectively for all 10 districts. This  
195 revealed that a large proportion of PSAC and adults reported the purchase of locally available  
196 drugs as the primary source of deworming in the past 6 months. This finding has potential  
197 implications for the national program as it may indicate communal behavioral change towards  
198 self-investment in preventive health. This could be a spillover effect of the sustained impact of  
199 school deworming in these districts, signaling that school-based MDA and accompanying  
200 community messaging raises awareness of the positive health outcomes of deworming,  
201 triggering treatment-seeking behavior in community members who do not have access to  
202 school MDAs but do have local access to affordable, high quality deworming medicines  
203 (Bangladesh generic manufacturers and formulations of benzimidazoles: CWW web-survey,  
204 2019). These initial findings need further exploration and, if confirmed, will be an important  
205 factor influencing a national policy of sustainable domestic financing guided by quality disease,  
206 socio-behavioral and pharmacological data. Similar behavioral changes should be explored by  
207 other national programs that have quality generics available locally for deworming.

208 **Conclusion:**

209           After 23 rounds of school-based MDA to lower the burden of STH infection since 2008, a  
210 review of survey data from 10 districts in Bangladesh shows that it is close to eliminating the  
211 infection as a public health problem from most of the country. To sustain current progress and  
212 move forward, Bangladesh needs to identify and treat all community members at risk in the  
213 persistent high-prevalence pockets of geographic areas, such as Sunamganj, Bhola, and  
214 Sirajganj. Community-based surveys may serve as better tools for a true assessment of PCT in  
215 endemic communities compared to more common school-based surveys and additional  
216 information on deworming sources is a valuable resource for national programs with high,  
217 multi-year coverage.

218 **Limitations:**

219           The ICSPM surveys had some limitations including a higher than expected stool  
220 nonresponse rate, possible recall bias (particularly the responses to the history and location of  
221 deworming questions), and gender inequity among adult respondents. Additionally, the timing  
222 between the stool sample deposit by the survey respondents and testing in the laboratory may  
223 have been longer than “ideal” due to geographical challenges so may have underestimated the  
224 hookworm prevalence slightly but there is only one published study that documents the “ideal”  
225 specimen testing interval for hookworms (15) and additional studies have shown little or no  
226 hookworm in south Asia.

227           It is of note that Bangladesh’s ELFSTH treated 19 LF-endemic districts with Albendazole  
228 (also active against STH worms) to control Lymphatic Filariasis (LF) through community-based



229 MDAs from 2001 to 2014. While these LF-focused MDAs also impacted the STH prevalence in  
230 those 19 districts, these treatments did not affect ICSPM results as the LF program ceased in  
231 2014 and ICSPM started data collection in 2017.

## **Acknowledgments**

We would like to express our sincere gratitude to all the staff of the respective district & sub-district health officials, field staff, and survey participants in Bangladesh, as well as the multiple CWW team members and consultants who historically contributed to protocol development and early implementation of some surveys. These surveys were supported with generous funding from Johnson & Johnson, and the Government of Canada.

## References:

1. WHO, editor Deworming for health and development : report of the third global meeting of the partners for parasite control.2004; Geneva: World Health Organization; 2005.
2. MOHFW. Neglected Tropical Diseases in Bangladesh: Situation Analysis and Gap Analysis. Dhaka, Bangladesh: Ministry of Health & Family Welfare, Government of Bangladesh; 2011.
3. Yajima A, Mikhailov A, Mbabazi PS, Gabrielli AF, Minchiotti S, Montresor A, et al. Preventive Chemotherapy and Transmission Control (PCT) databank: a tool for planning, implementation and monitoring of integrated preventive chemotherapy for control of neglected tropical diseases. *Trans R Soc Trop Med Hyg.* 2012;106(4):215-22.
4. Kabatereine NB, Malecela M, Lado M, Zaramba S, Amiel O, Kolaczinski JH. How to (or not to) integrate vertical programmes for the control of major neglected tropical diseases in sub-Saharan Africa. *PLoS Negl Trop Dis.* 2010;4(6):e755.
5. Parker M, Allen T. Does mass drug administration for the integrated treatment of neglected tropical diseases really work? Assessing evidence for the control of schistosomiasis and soil-transmitted helminths in Uganda. *Health Res Policy Syst.* 2011;9:3.
6. Dunn JC, Bettis AA, Wyine NY, Lwin AMM, Tun A, Maung NS, et al. Soil-transmitted helminth reinfection four and six months after mass drug administration: results from the delta region of Myanmar. *PLoS Negl Trop Dis.* 2019;13(2):e0006591.
7. Benjamin-Chung J, Nazneen A, Halder AK, Haque R, Siddique A, Uddin MS, et al. The Interaction of Deworming, Improved Sanitation, and Household Flooring with Soil-Transmitted Helminth Infection in Rural Bangladesh. *PLoS Negl Trop Dis.* 2015;9(12):e0004256.
8. Fleming FM, Matovu F, Hansen KS, Webster JP. A mixed methods approach to evaluating community drug distributor performance in the control of neglected tropical diseases. *Parasit Vectors.* 2016;9(1):345.
9. Gyorkos TW, Montresor A, Belizario V, Biggs BA, Bradley M, Brooker SJ, et al. The right to deworming: The case for girls and women of reproductive age. *PLoS Negl Trop Dis.* 2018;12(11):e0006740.
10. Davlin SL, Jones AH, Tahmina S, Kawsar AA, Joshi A, Zaman SI, et al. Soil-transmitted helminthiasis in four districts in Bangladesh: household cluster surveys of prevalence and intervention status. *BMC Public Health.* 2020;20(1):672.
11. WHO. Assessing the epidemiology of STH during TAS. Geneva, Switzerland: World Health Organization; 2015. 44 p.
12. WHO. 2030 targets for soil-transmitted helminthiasis control programmes. Geneva: World Health Organization; 2019.
13. WHO/NTD. Helminth control in school age children: a guide for managers of control programmes. Second ed. Geneva: WHO, diseases Docont; 2011. Report No.: ISBN: 978 92 4 150 312 9.
14. Ediriweera DS, Gunawardena S, Gunawardena NK, Iddawela D, Kannathasan S, Muruganathan A, et al. Reassessment of the prevalence of soil-transmitted helminth infections in Sri Lanka to enable a more focused control programme: a cross-sectional national school survey with spatial modelling. *Lancet Glob Health.* 2019;7(9):e1237-e46.
15. Dacombe RJ, Crampin AC, Floyd S, Randall A, Ndhlovu R, Bickle Q, et al. Time delays between patient and laboratory selectively affect accuracy of helminth diagnosis. *Trans R Soc Trop Med Hyg.* 2007;101(2):140-5.

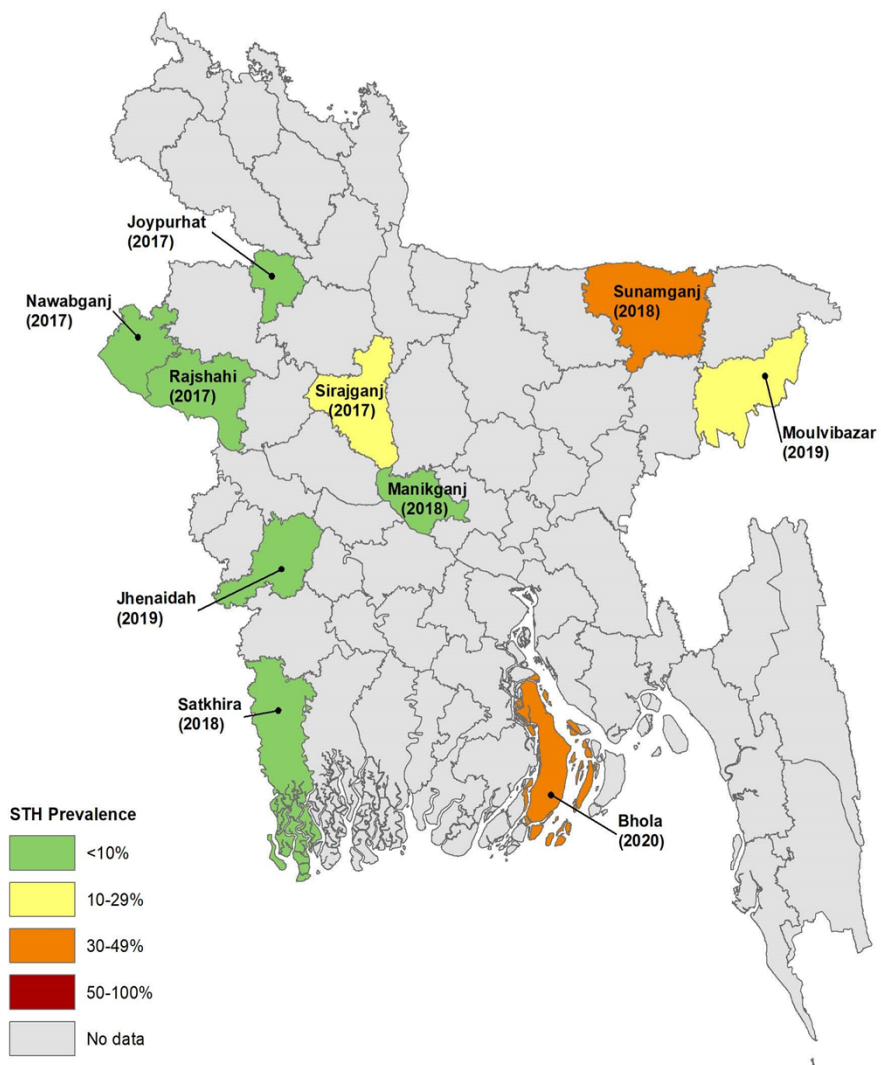

**Figure 1: Geographical distribution of ICSPM surveys, year of survey and STH prevalence range**

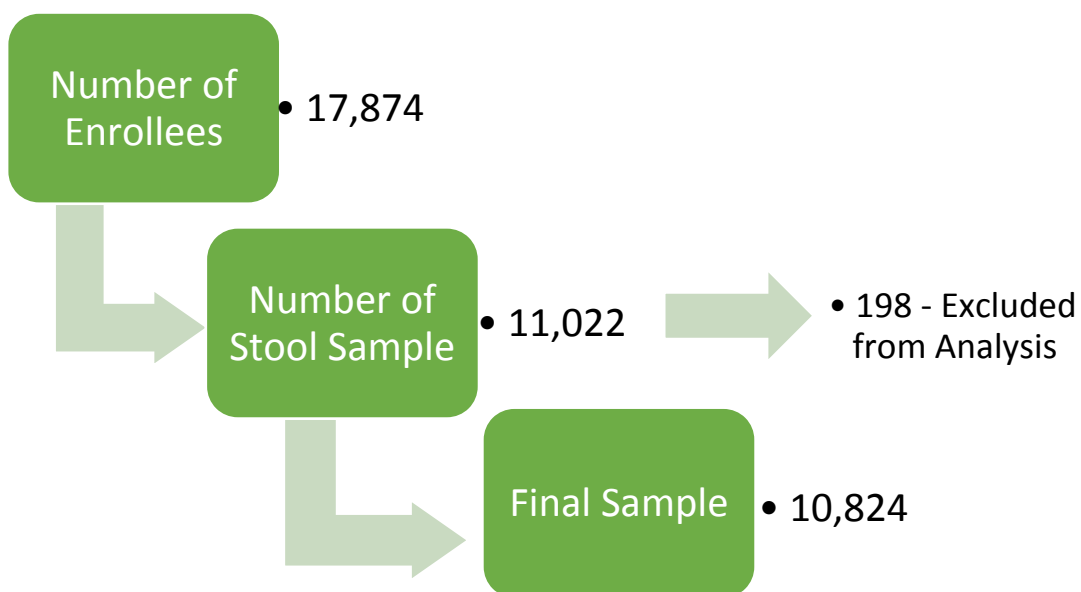

**Figure 2: Flow chart of sample selection**

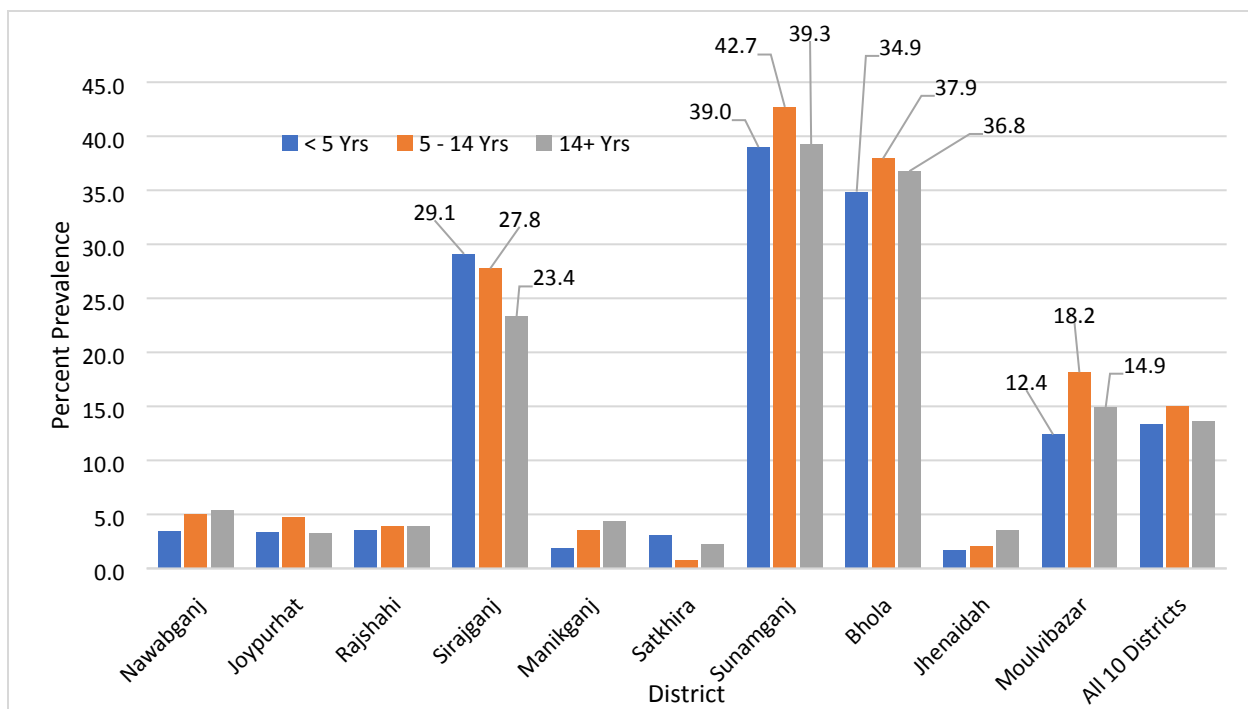

**Figure 3: Prevalence of any STH infection by district and age group**

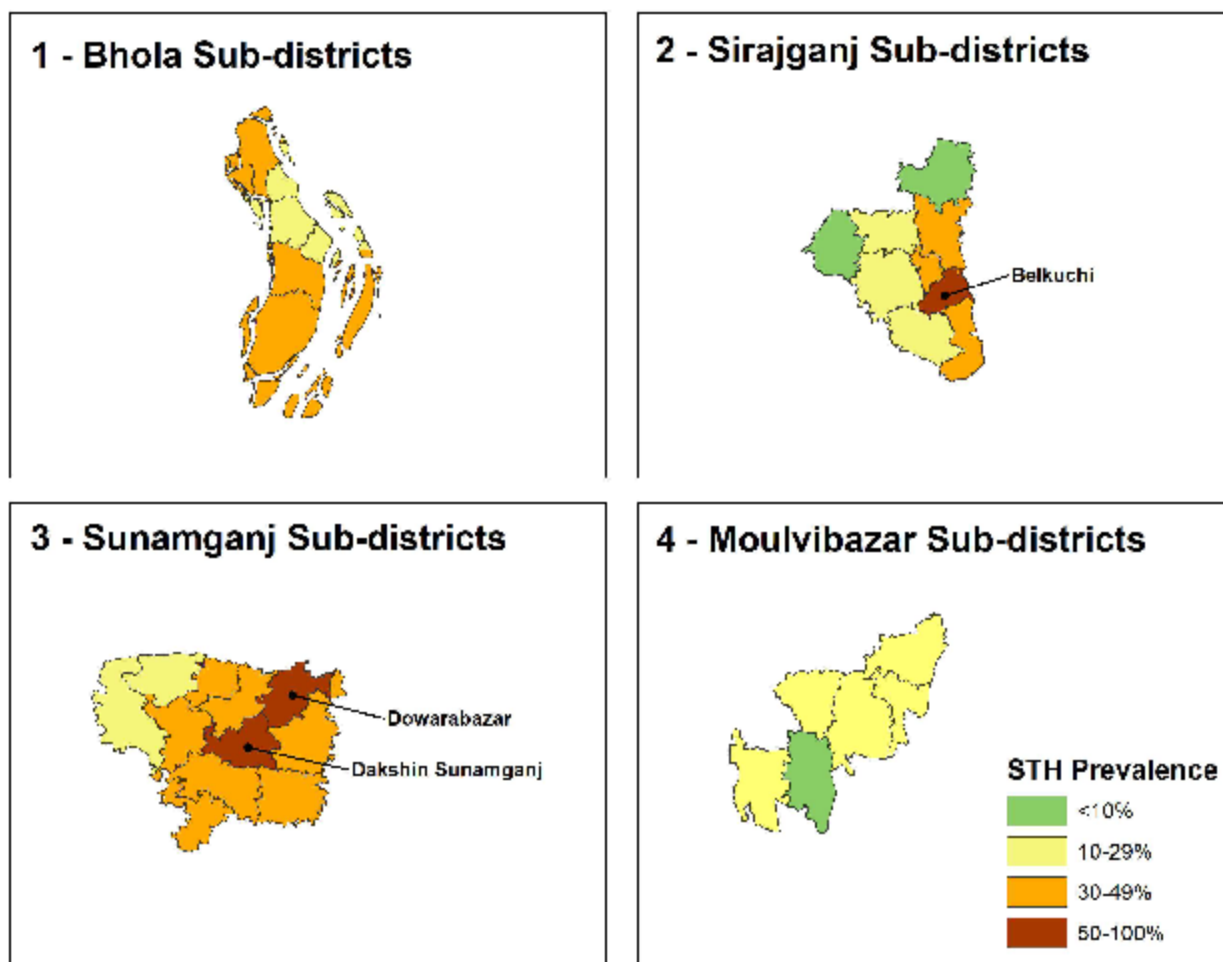

Figure 4: STH prevalence by sub-districts in the highest prevalent ICSPM districts

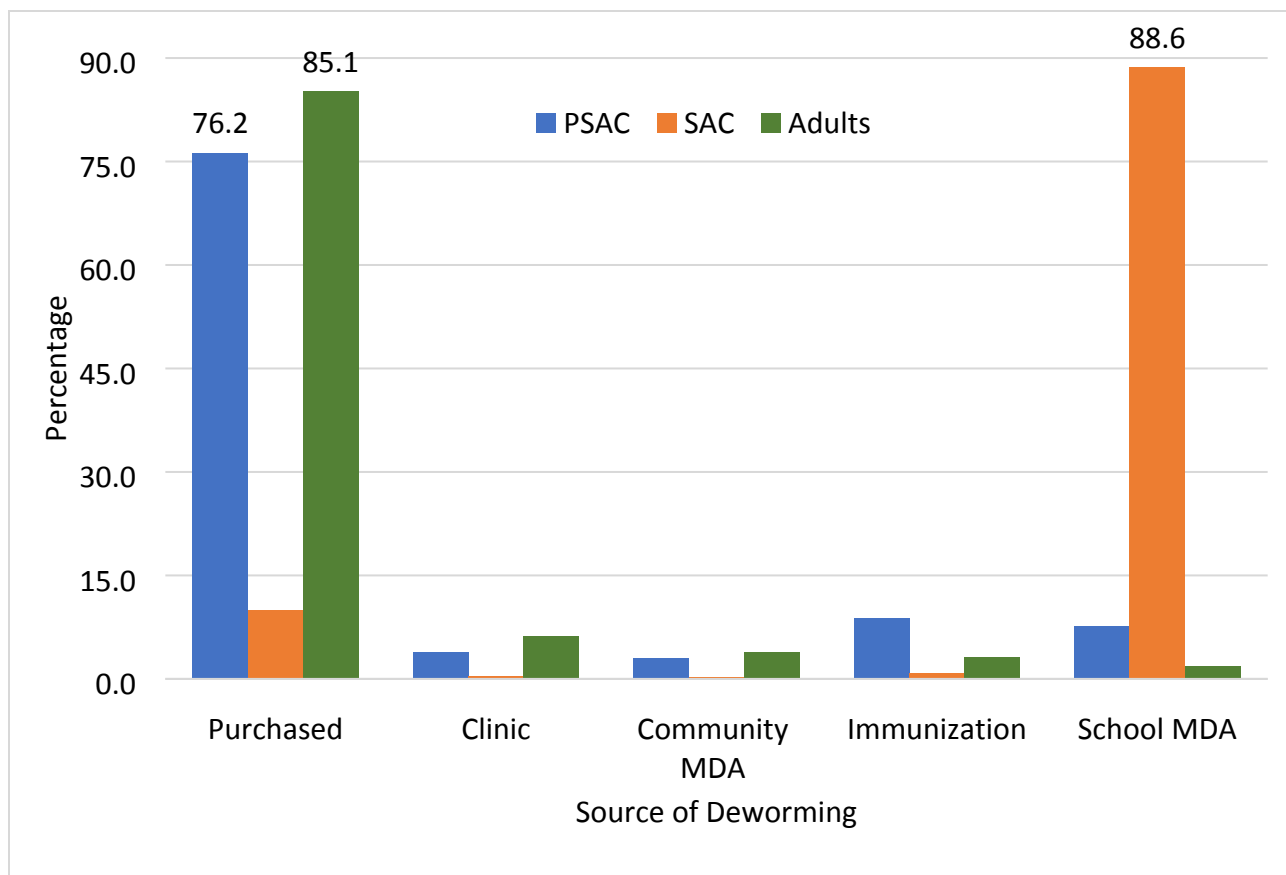

**Figure 5: Source of deworming among those who reported deworming in the previous year**



**Table 1: Intensity of STH morbidity by district**

| District                | Intensity of STH Morbidity among All (Prevalence %) |            |            | All Ages (%) |
|-------------------------|-----------------------------------------------------|------------|------------|--------------|
|                         | PSAC                                                | SAC        | Adults     |              |
| Sirajganj               | 7.0                                                 | 6.6        | 7.8        | 7.1          |
| Sunamganj               | 12.2                                                | 8.6        | 10.2       | 10.4         |
| Bhola                   | 12.0                                                | 11.1       | 8.5        | 10.6         |
| Moulvibazar             | 3.6                                                 | 4.8        | 2.4        | 3.6          |
| <b>All 10-districts</b> | <b>3.6</b>                                          | <b>3.4</b> | <b>2.7</b> | <b>3.3</b>   |

**Table 2: History of deworming within the past 6 months**

| History of deworming    | Risk group N (%)  |                   |                   | All Ages (%)      |
|-------------------------|-------------------|-------------------|-------------------|-------------------|
|                         | PSAC              | SAC               | Adults            |                   |
| Yes                     | 1053 (37.3)       | 2733 (75.6)       | 755 (25.6)        | 4541 (48.4)       |
| No                      | 1769 (62.7)       | 884 (24.4)        | 2192 (74.4)       | 4845 (51.6)       |
| <b>All 10-districts</b> | <b>2822 (100)</b> | <b>3617 (100)</b> | <b>2947 (100)</b> | <b>9386 (100)</b> |
